# Supplementary material for: Effective use of dupilumab for eosinophilic gastritis concomitant with severe asthma
Source: Research Square preprint supplement (doi:10.21203/rs.3.rs-4610494/v1), 2024-07-22
Supplement: Supplementary file 1 [file 74c6355937872842500e4426.xlsx]

## Sheet: Sheet1
	Table 1 Laboratory findings
	Hematology			LDH	219	IU/L
	WBC	13800	/µL	BUN	9	mg/dL
	Neutrophils	58.5	%	Cre	0.67	mg/dL
	Lymphocytes	17	%	Na	139	mM/L
	Eosinophils	22	%	K	4.1	mM/L
	Monocytes	2.5	%	Cl	104	mM/L
	RBC	481	×104	Serology
	Hb	14.1	g/dL	CRP	0.4	mg/dL
	Hct	42.2	%	PR3-ANCA	<1.0	U/mL
	Plt	32.2	×104	MPO-ANCA	<1.0	U/mL
	Biochemistry			IgE	780	IU/mL
	Alb	3.7	g/dL	Cedar	65.8	(class4)
	AST	12	IU/L	Timothy	7.32	(class2)
	ALT	8	IU/L
